# Supplementary material
Source: MDPI journal article supplement (https://www.mdpi.com/2073-4441/14/13/2029)
Supplement: s1 [file s1]

Supplementary Materials:

# Earth Dam Design for Drinking Water Management and Flood Control: A Case Study

Bethy Merchán-Sanmartín 1,2,3, Joselyn Aucapeña-Parrales 1,2, Ricardo Alcívar-Redrován 1,2, Paúl Carrión-Mero 1,2,\* and María Jaya-Montalvo 1,2,\* and Mijail Arias-Hidalgo 1,4

<sup>1</sup> Facultad de Ingeniería Ciencias de la Tierra (FICT), ESPOL Polytechnic University, Escuela Superior, Politécnica del Litoral, ESPOL, Campus Gustavo Galindo Km 30.5 Vía Perimetral, Guayaquil P.O. Box 09-01-5863, Ecuador; betgumer@espol.edu.ec (B.M.-S.); jaucapen@espol.edu.ec (J.A.-P.); raalciva@espol.edu.ec (R.A.-R.); mijedari@espol.edu.ec (M.A.-H.)

<sup>2</sup> Centro de Investigación y Proyectos Aplicados a las Ciencias de la Tierra (CIPAT), ESPOL Polytechnic University, Escuela Superior Politécnica del Litoral, ESPOL, Campus Gustavo Galindo, Km. 30.5 Vía Perimetral, Guayaquil P.O. Box 09-01-5863, Ecuador

<sup>3</sup> Geo-Recursos y Aplicaciones (GIGA), ESPOL Polytechnic University, Escuela Superior Politécnica del Litoral, ESPOL, Campus Gustavo Galindo Km. 30.5 Vía Perimetral, Guayaquil P.O. Box 09-01-5863, Ecuador

<sup>4</sup> Centro del Agua y Desarrollo Sustentable (CADS), ESPOL Polytechnic University, Escuela Superior, Politécnica del Litoral, ESPOL, Campus Gustavo Galindo, Km. 30.5 Vía Perimetral, Guayaquil P.O. Box 09-01-5863, Ecuador

\* Correspondence: pcarrion@espol.edu.ec (P.C.-M.); mjaya@espol.edu.ec (M.J.-M.); +593-99-826-5290 (P.C.-M.); +593-98-250-9363 (M.J.-M.)

$$y_c = y_i \left( \frac{Z_c}{Z_i} \right)^{\frac{2}{M}} \quad (S1)$$

Hence:

$y_c$  = critical depth

$y_i$  = alternate depth

$Z_c$  = critical state section factor

$Z_i$  = alternate section factor

$$Z_c = \frac{Q}{\sqrt{g}} \quad (S2)$$

Hence:

$Z_c$  = critical state section factor.

$Q$  = critical discharge

$g$  = 9.81 [m/s<sup>2</sup>]

$$Z_i = A_i * \sqrt{D_i} \quad (S3)$$

Hence:

$Z_i$  = alternate section factor

$A_i$  = alternate water area

$D_i$  = alternate hydraulic depth

$$M = \frac{2 * \log \left( \frac{Z_1}{Z_2} \right)}{\log \left( \frac{y_1}{y_2} \right)} \quad (S4)$$

Hence:

$M$  = Hydraulic exponent for critical-flow computation

$Z_1$  = First value section factor

$Z_2$  = Second value section factor

$y_1$  = First value section depth

$y_2$  = Second value section depth

$$\left( \frac{K_1}{K_2} \right)^2 = \left( \frac{y_1}{y_2} \right)^N \quad (S5)$$

Hence:

$K_1$  = Difference in elevation

$K_2$  = Difference in elevation

$y_1$  = First value section depth

$y_2$  = Second value section depth

$N$  = Depth of depression in throat below crest

$$N = \frac{2 * \log \left( \frac{K_1}{K_2} \right)}{\log \left( \frac{y_1}{y_2} \right)} \quad (S6)$$

Hence:

$K_1$  = Alternate conveyance

$K_2$  = Alternate conveyance

$y_1$  = first value section depth

$y_2$  = Second value section depth

$N$  = Hydraulic exponent for uniform-flow computation

$$K_0 = \frac{Q}{\sqrt{S_0}} \quad (S7)$$

Hence:

$K_0$  = Conveyance

$Q$  = Discharge

$S_0$  = Slope of the water surface

$$K_i = \left(\frac{1}{n}\right) * A_i * R h_i^{\frac{2}{3}} \quad (S8)$$

Hence:

$K_i$  = Difference in elevation

$n$  = Coefficient of roughness

$A_i$  = Water area

$R$  = Hydraulic radius

$$\frac{dy}{dx} = \frac{S_0 - S_f}{\sqrt{1 - S_0^2} - \frac{Q^2 T}{g A^3}} = \frac{Num. \left(y + \frac{\Delta y}{2}\right)}{Den. \left(y + \frac{\Delta y}{2}\right)} = \frac{Num. \left(y_i + \frac{1}{2}\right)}{Den. \left(y_i + \frac{1}{2}\right)} \quad (S9)$$

Hence:

$S_0$  = Slope of the water surface

$S_f$  = Alternate of slope of water

$Q$  = Discharge

$T$  = Temperature of water

$g$  = Gravity acceleration

$A$  = Water area

$$\frac{\Delta y}{\Delta x} = \frac{Num. \left(y + \frac{\Delta y}{2}\right)}{Den. \left(y + \frac{\Delta y}{2}\right)}$$

$$\Delta x = \Delta y * \frac{Den. \left(y + \frac{\Delta y}{2}\right)}{Num. \left(y + \frac{\Delta y}{2}\right)}$$

$$d = \Delta h + hr + a \quad (S10)$$

Hence:

$d$  = Shelter above the static level of the reservoir.

$\Delta h$  = Wave drag lift (m)

$hr$  = Wave bearing height (m)

$a$  = 0.5 m (for all loose material dam categories)

$$\Delta h = 2 * 10^{-6} * \frac{DW^2}{gH} \cos(\alpha) \quad (S11)$$

Hence:

$\alpha$  = Angle between the axis normal to the axis of the dam and the wind direction.

D = Fetch (km)

W = Wind speed (m/s)

H = Depth (m)

Replacing:

$$\Delta h = 2 * 10^{-6} * \frac{1.6 * (13.59)^2}{9.81 * (20)} \cos (0)$$

$$\Delta h = 3 * 10^{-6} = 0$$

$$h_r = 2 * \frac{k_r}{m} h_{i\%}^3 \sqrt{\frac{\lambda}{h}} \quad (S12)$$

Hence:

$k_r$  = Roughness coefficient

$m$  = Upstream slope

$h_{3\%}$  = Wave height with 3% probability of occurrence

$\lambda$  = Wave length

$$k_r = 0.115 + 0.151 * \ln \frac{h}{D_e} \quad (S13)$$

Hence:

$k_r$  = Bearing coefficient

$h$  = Wave height above the upstream parameter

$D_e$  = Riprap diameter

$$k_r = 0.115 + 0.151 * \ln \frac{0.348}{0.14}$$

$$k_r = 0.25$$

$$D_e = 0.46 \frac{h}{m^{0.1}} \quad (S14)$$

Hence:

$D_e$  = Riprap diameter

$h$  = Wave height

$m$  = Upstream slope

$$D_e = 0.46 \frac{0.348}{(3.5)^{0.1}}$$

$$D_e = 0.14$$

$$h_{3\%} = k_{3\%} * h \quad (S15)$$

Hence:

$h_{3\%}$  = Wave height with 3% probability of occurrence

$k_{3\%}$  = Rolling coefficient with probability of 3% occurrence

$h$  = Wave height

$$h_{3\%} = 1.85 * 0.348$$

$$h_{3\%} = 1.85 \text{ m}$$

$$\lambda = \frac{9.78 * (\tau)^2}{2 * \pi} \quad (S16)$$

Hence:

$\lambda$  = Wavelength

$\tau$  = Wave period

$$\tau = 7.5 \frac{h^{3/5}}{W^{1/5}} \quad (S17)$$

Hence:

$\tau$  = wave period

$h$  = wave height

$W$  = wind speed

Replacing  $\tau$  in equation 17, we have:

$$\lambda = \frac{9.78 * (2.36)^2}{2 * \pi}$$

$$\lambda = 8.68 \text{ m}$$

From equation (13):

$$h_r = 2 * \frac{0.25}{3.5} 1.85^3 \sqrt{\frac{8.68}{0.348}}$$

$$h_r = 2 * \frac{0.25}{3.5} 1.85^3 \sqrt{\frac{8.68}{0.348}}$$

$$h_r = \mathbf{0.27 \text{ m}}$$

$$C_0 = m_0 C_1 C_2 C_3 C_4, \quad (\text{S18})$$

Donde:

$C_0$ : Discharge coefficient

$C_1$  = Affectation coefficient for loads other than project load.

$C_2$  = Coefficient of affectation due to the inclination of the wall.

$C_3$  = Affectation coefficient due to the effect of the sink downstream

$C_4$  = Affectation coefficient due to submersion.

The value of  $m_0$  was obtained through equation 22. Where  $Ho$  is the total or design hydraulic head, P is the height of the face, which is established from the height of the crest to the bottom of the channel, and the relationship  $\frac{P}{Ho}$  indicates the relative depth of arrival.

$$m_0 = \frac{0.385 + 3.9206 \left[ \frac{P}{Ho} \right]}{1 + 7.8192 \left[ \frac{P}{Ho} \right]}, \quad (\text{S19})$$

The coefficients of  $C_0$  were obtained through equations 23, 24, and 25. As it was not necessary to include a slope to the spillway, the value of C2 was 1.

$$C_1 = \frac{0.7917 + 0.7591 * \left[ \frac{Ho}{He} \right]}{1 + 0.5490 * \left[ \frac{Ho}{He} \right]}, \quad (\text{S20})$$

$$C_3 = 0.77 + 1.115 \left[ \frac{P}{Ho} \right] - 1.1997 \left[ \frac{P}{Ho} \right]^{1.5} + 0.306 \left[ \frac{P}{Ho} \right]^2, \quad (\text{S21})$$

$$C_4 = 0.0047 + 16.6579 \left[ \frac{hd}{Ho} \right] - 44.4645 \left[ \frac{hd}{Ho} \right]^{1.5} + 44.6722 \left[ \frac{hd}{Ho} \right]^2 - 15.8993 \left[ \frac{hd}{Ho} \right]^{2.5}, \quad (S22)$$

From equations 23-25. **He** is a variation of the hydraulic load due to the flow coefficient, originating in a relative floor position concerning the crest of the spillway. In contrast, the  $\frac{Ho}{He}$  ratio establishes the shape of the real sheet relative to that of the analysis. **hd** is the variation of the hydraulic load caused by the effects of drowning or submersion of the top.

**Table S1.** Data required for the normal depth.

| Alternative | n     | S0     | K0       | $A_i[m^2]$ | $P_m[m]$ |
|-------------|-------|--------|----------|------------|----------|
| A           | 0.131 | 0.0006 | 51124.93 | 2301.46    | 198.87   |
|             |       |        |          | 1617.21    | 113.03   |
| B           | 0.100 | 0.0005 | 56004.56 | 1348.87    | 111.02   |
|             |       |        |          | 1005.89    | 97.03    |
| C           | 0.117 | 0.0003 | 72301.57 | 2626.55    | 174.36   |
|             |       |        |          | 1777.70    | 131.69   |

$$Q_{design} = 1252.3 \frac{m^3}{s}$$

$$Y_1 = \text{Normal depth}$$

$$Y_2 = \text{NAMO}$$

$$S_0 = 0.0005$$

$$n_{sill} = 0.10005$$

$$\Delta y = 0.5 [m]$$

**Table S2.** Slopes for earthen dams [1].

| Parameter        | Calculation                                                                                                                                                                                                            |
|------------------|------------------------------------------------------------------------------------------------------------------------------------------------------------------------------------------------------------------------|
| Upstream slope   | According to the table proposed by Nedrigi [1], for heights 15 and 50 m, a slope between 3 and 4 m is recommended.                                                                                                     |
| Downstream slope | According to the table proposed by Nedrigi [1], for dam heights 15 and 50, a slope between 4 and 4.5 m is recommended.                                                                                                 |
| Downstream berm  | <p>Downstream depth = NAA – NSC</p> <p>Downstream depth = 20.91 – 20</p> <p>Downstream depth = 0.91</p> <p>The rockfill will have a height of 1m, at 21.5 m.a.s.l. and a width of 3m.</p> <p>NAA= Downstream level</p> |

|                           |                                                                                                                                                                                                                                                                 |
|---------------------------|-----------------------------------------------------------------------------------------------------------------------------------------------------------------------------------------------------------------------------------------------------------------|
|                           | NSC= bed level                                                                                                                                                                                                                                                  |
| Upstream berm             | <p>Upstream berm level= NAMU – 2h<br/> NAMU: Last maximum water level<br/> Upstream berm level = 25-2(0.348) m.a.s.l.<br/> Upstream berm level = 24.30 m.a.s.l.</p> <p>The protection width of the upstream slope has a thickness of 1m with a width of 3m.</p> |
| Riprap dimensions         | $G_p = \frac{0.025 * \lambda^2 * \gamma_p}{\left(\frac{\gamma_p}{\gamma} - 1\right)^3 * \sqrt[3]{1 + m^3}}$ $D_e = \sqrt{\frac{G_p}{0.524\gamma_p}}$ $D_e = 0.46 * \frac{h}{m^{0.1}}$                                                                           |
| Crown width               | <p>According to the MOP of Spain [2]</p> $B = 3 + 1.5 \sqrt{H - 15}$ $B = 3 + 1.5 \sqrt{21 - 15}$ $B = 6.60 \text{ m}$                                                                                                                                          |
| Geomembrane waterproofing | <p>To calculate the thickness you have to:</p> $t_g = 0.75 + \frac{H}{25}$ $t_g = 0.75 + \frac{21}{25}$ $t_g = 2 \text{ mm}$                                                                                                                                    |
| Concrete facing thickness | <p>The following equation determines the concrete screen thickness in the upstream dam:</p> $t = 1 + (0.00735 * h)[ft]$ $t = 1 + (0.00735 * 68.9)[ft]$ $t = 0.46 \text{ m}$                                                                                     |

1. Nedrigi, V.P. *Designer's Handbook. Hydraulic Structures [in Russian]*; Stroizdat: Moscow, 1983;
2. Ministerio de Obras Públicas de España *Instrucción Para Proyecto, Construcción y Explotación de Grandes Presas*; Madrid, España, 1967;



**Table S3.** Assessment of environmental impacts.

| Activities                          | Environmental aspect     | Impact                 | Identification of environmental impacts for this study |        |          |                            |          |         |                      |               |          |      |               |          |      |               |             |           |                  |             |           |              |           |              |                  |            | Valuation   |                              |                                |
|-------------------------------------|--------------------------|------------------------|--------------------------------------------------------|--------|----------|----------------------------|----------|---------|----------------------|---------------|----------|------|---------------|----------|------|---------------|-------------|-----------|------------------|-------------|-----------|--------------|-----------|--------------|------------------|------------|-------------|------------------------------|--------------------------------|
|                                     |                          |                        | Severity (S)                                           |        |          | Probability Occurrence (P) |          |         | Impact Relevance (T) | Extension (E) |          |      | Intensity (I) |          |      | Duration (Du) |             |           | Development (De) |             |           | Recovery (R) |           |              | Interaction (Ia) |            |             | Impact Magnitude (Mg)        | Importance of the Impact (Imp) |
|                                     |                          |                        | 1                                                      | 2      | 3        | 1                          | 2        | 3       |                      | 0             | 1        | 2    | 0             | 1        | 2    | 0             | 1           | 2         | 0                | 1           | 2         | 0            | 1         | 2            | 0                | 1          | 2           | Mg= E + I + Du + De + R + Ia | Imp = Mg x T                   |
|                                     |                          |                        | positive                                               | medium | negative | very unlikely              | unlikely | certain | T=SxP                | punctual      | partiale | high | low           | moderate | high | short term    | medium term | permanent | long term        | medium term | immediate | reversible   | mitigable | irreversible | simple           | cumulative | synergistic |                              |                                |
| Land expropriation<br>(dam context) | Gas emission             | Air pollution          |                                                        | 2      |          |                            |          | 3       | 6                    |               | 1        |      |               | 1        |      | 0             |             |           | 2                |             | 1         |              |           | 1            |                  |            | 6           | 36                           |                                |
|                                     | Noise generation.        | Air pollution          |                                                        | 2      |          |                            |          | 3       | 6                    |               |          | 2    |               | 1        |      | 1             |             | 1         |                  | 0           |           |              |           | 1            |                  |            | 6           | 36                           |                                |
|                                     | Demolition of structures | Air and soil pollution |                                                        | 2      |          |                            |          | 3       | 6                    |               |          | 2    |               | 2        |      | 1             |             | 0         |                  |             | 1         |              |           |              |                  |            | 6           | 36                           |                                |

|                   |                                |                                                            |   |   |   |   |   |   |   |   |   |   |    |
|-------------------|--------------------------------|------------------------------------------------------------|---|---|---|---|---|---|---|---|---|---|----|
| Camp construction | Deforestation                  | Soil contamination                                         | 3 | 3 | 9 | 2 | 2 | 1 | 0 | 0 | 1 | 6 | 54 |
|                   | Loss of vegetation cover       | Soil contamination                                         | 2 | 2 | 4 | 2 | 2 | 1 | 1 | 1 |   | 7 | 28 |
|                   | Air quality                    | Increase in CO2 emissions                                  | 2 | 2 | 4 | 1 | 0 | 1 | 1 | 2 | 2 | 7 | 28 |
|                   | Presence of particulate matter | Fine particles that can affect project workers             | 3 | 3 | 9 | 2 | 1 | 1 | 2 | 2 | 1 | 9 | 81 |
|                   | Wastewater discharge           | Change in BOD and COD concentration in the Vinces Riverbed | 2 | 3 | 6 | 1 | 1 | 1 | 2 | 1 | 1 | 7 | 42 |



|                                   |                               |                                                 |   |   |   |   |   |   |   |   |   |    |    |
|-----------------------------------|-------------------------------|-------------------------------------------------|---|---|---|---|---|---|---|---|---|----|----|
| Filled with enhancement material  | Increased pressure on slopes  | Slope stability                                 | 1 | 2 | 2 | 1 | 2 | 2 | 1 | 1 | 1 | 8  | 16 |
|                                   | Generation of lubricant waste | Control and transport of this waste             | 2 | 2 | 4 | 0 | 1 | 1 | 1 | 1 | 1 | 5  | 20 |
|                                   | Deforestation                 | Loss of species habitat                         | 2 | 3 | 6 | 2 | 2 | 2 | 2 | 2 | 0 | 10 | 60 |
|                                   | Pollutant discharge           | Action of heavy metals, solvents and pesticides | 1 | 2 | 2 | 1 | 1 | 1 | 1 | 1 | 1 | 6  | 12 |
| Camp waste management, workshops, | Generation of lubricant waste | Fauna/flora alteration                          | 3 | 2 | 6 | 1 | 1 | 1 |   |   |   | 3  | 18 |

|                                         |                                         |                                  |                                                                    |   |   |   |   |   |   |   |   |   |   |    |
|-----------------------------------------|-----------------------------------------|----------------------------------|--------------------------------------------------------------------|---|---|---|---|---|---|---|---|---|---|----|
|                                         |                                         | Concrete waste generation        | Lack of control in transportation to specialized collection points | 2 | 2 | 4 | 0 | 1 | 1 |   |   |   | 2 | 8  |
|                                         |                                         | Solid waste generation           |                                                                    | 2 | 2 | 4 | 1 | 1 | 1 |   |   |   | 3 | 12 |
| Construction of the hydraulic structure |                                         | Concrete waste generation        | Lack of control in transportation to specialized collection points | 2 | 3 | 6 | 0 | 1 | 1 |   |   |   | 2 | 12 |
|                                         |                                         | Solid waste generation           |                                                                    | 2 | 3 | 6 | 1 | 1 | 1 |   |   |   | 3 | 18 |
|                                         |                                         | Recycling of metallic materials. |                                                                    | 2 | 2 | 4 | 1 | 0 | 0 |   |   |   | 1 | 4  |
| Filling phase                           | Vegetation rehabilitation in the plain. | Reforestation                    | Increases soil productivity                                        | 1 | 3 | 3 | 1 | 2 | 2 | 0 | 0 | 0 | 5 | 15 |
|                                         | Soil quality improvement                |                                  |                                                                    | 1 | 3 | 3 | 1 | 2 | 2 | 0 | 0 | 0 | 5 | 15 |



**Table S4.** Prevention/mitigation measures.

| <b>Environmental impact</b>                         | <b>Prevention/mitigation measures</b>                                                                                                                                                                                                                                                                                         |
|-----------------------------------------------------|-------------------------------------------------------------------------------------------------------------------------------------------------------------------------------------------------------------------------------------------------------------------------------------------------------------------------------|
| Water contamination by the discharge of pollutants. | <ul style="list-style-type: none"><li>• Maintenance processes that include using different machinery must be carried out in facilities with grease traps and grit traps.</li><li>• Adapt a particular site to store materials away from the body of water.</li></ul>                                                          |
| Increase in noise levels and atmospheric emissions. | <ul style="list-style-type: none"><li>• Program work cycles of two hours of continuous noise with two hours of rest.</li><li>• Implement silencers in the vehicles that operate in the project.</li><li>• Establish a single schedule for loading and unloading materials.</li></ul>                                          |
| Waste generation                                    | <ul style="list-style-type: none"><li>• The removed material must be stored so that it loses moisture to facilitate its disposal in places authorized by the corresponding entity.</li></ul>                                                                                                                                  |
| Alteration of vegetation cover                      | <ul style="list-style-type: none"><li>• Rehabilitate disturbed soils to guarantee the fertility of areas where landscaping is proposed.</li><li>• Correct stability of slopes in the geotechnical design.</li></ul>                                                                                                           |
| Soil contamination                                  | <ul style="list-style-type: none"><li>• Avoid spillage of oil or other substances used in the construction process.</li><li>• Make the concrete mixtures on a platform to avoid soil contamination.</li></ul>                                                                                                                 |
| Natural water current alteration.                   | <ul style="list-style-type: none"><li>• Slope stabilization, replanting and keeping the site free of debris.</li><li>• Request the permit to occupy the channel.</li><li>• Generate the most negligible impact on the hydraulic system and follow the guidelines of the occupation permit for the channel obtained.</li></ul> |
| Generation of vegetable waste                       | <ul style="list-style-type: none"><li>• Remove the vegetable waste so that it is not contaminated with other materials to reuse it in the final landscaping of the work.</li></ul>                                                                                                                                            |
| Generation of particulate matter                    | <ul style="list-style-type: none"><li>• The work front must be closed with mesh.</li><li>• Construction materials must be covered for protection against air and water.</li><li>• Use of personal protective equipment.</li></ul>                                                                                             |
